# Supplementary material for: Constructing vertically aligned ZIF-67 microrod arrays on carbon cloth with commercial-level mass-loading for high-performance supercapacitors
Source: Royal Society of Chemistry journal article supplement (doi:10.1039/d4qm00818a), 2024-11-27
Supplement: d4qm00818a1.pdf [file d4qm00818a1.pdf]

## Supporting information

# Constructing Vertically Aligned ZIF-67 Microrod Arrays on Carbon Cloth with Commercial-level Mass-loading for High-performance Supercapacitors

Chenchen Bai,<sup>a</sup> Bingjun Li,<sup>a</sup> Dejun Li,<sup>a</sup> Yan Han <sup>\*a</sup> and Caiyun Wang <sup>\*b</sup>

<sup>a</sup> College of Physics and Materials Science, Tianjin Normal University, Tianjin 300387, China

<sup>b</sup> Faculty of Engineering and Information Sciences, University of Wollongong, New South Wales  
2500, Australia

**Fig. S1** (a, b) SEM images and (c, d) capacitive performances of Co/CC immersed in a 2-MeIM aqueous solution for 24 h followed by adding  $\text{Co}(\text{NO}_3)_2 \cdot 6\text{H}_2\text{O}$  aqueous solution for another 24 h (a, c) and 72 h (b, d).

**Fig. S2** (a-d) SEM images of bare CC (a, b) and Co/CC (c, d). (e) EDS mappings of Co/CC.

**Fig. S3** XRD pattern of Co/CC.

**Fig. S4** (a) SEM image and (b) EDS mappings of ZIF-67/CC-24.

**Fig. S5** TEM image of ZIF-67/CC.

**Fig. S6** Digital photographs of ZIF-67 grown on bare CC and Co-covered CC: (a) bare CC immersed in an aqueous solution containing 2-MeIM and  $\text{Co}(\text{NO}_3)_2 \cdot 6\text{H}_2\text{O}$  for 72 h; (b) Co/CC immersed in a 2-MeIM aqueous solution for 72 h; (c) Co/CC immersed in a 2-MeIM aqueous solution for 24 h followed by adding  $\text{Co}(\text{NO}_3)_2 \cdot 6\text{H}_2\text{O}$  aqueous solution for another 48 h.

**Fig. S7** (a) SEM image and (b) EDS mappings of ZIF-67/CC-NC.

**Fig. S8** Full scan survey XPS spectrum for ZIF-67/CC-24.

**Fig. S9** High-resolution XPS C1s spectrum of ZIF-67/CC.

**Fig. S10** TGA curves of ZIF-67/CC, CC and ZIF-67 powders.

**Fig. S11** (a) XPS spectra of Co 2p and (b) XRD pattern of ZIF-67/CC electrode after cycling.

**Fig. S12** (a) CV curves of AC/CC electrode at different scan rates. (b) Galvanostatic charge-discharge curves of AC/CC electrode at different current densities.

**Fig. S13** CV curves of ZIF-67/CC//AC/CC ASSC device collected within different potential windows at  $10 \text{ mV s}^{-1}$ .

**Fig. S14** Cycling performance of ZIF-67/CC//AC/CC ASSC device at  $10 \text{ mA cm}^{-2}$ .

**Fig. S15** Nyquist plot of the ASSC device.

**Table S1** Capacitive performance comparison of reported MOF materials.

**Table S2** Comparison of areal energy and power densities for some reported MOF-based devices.

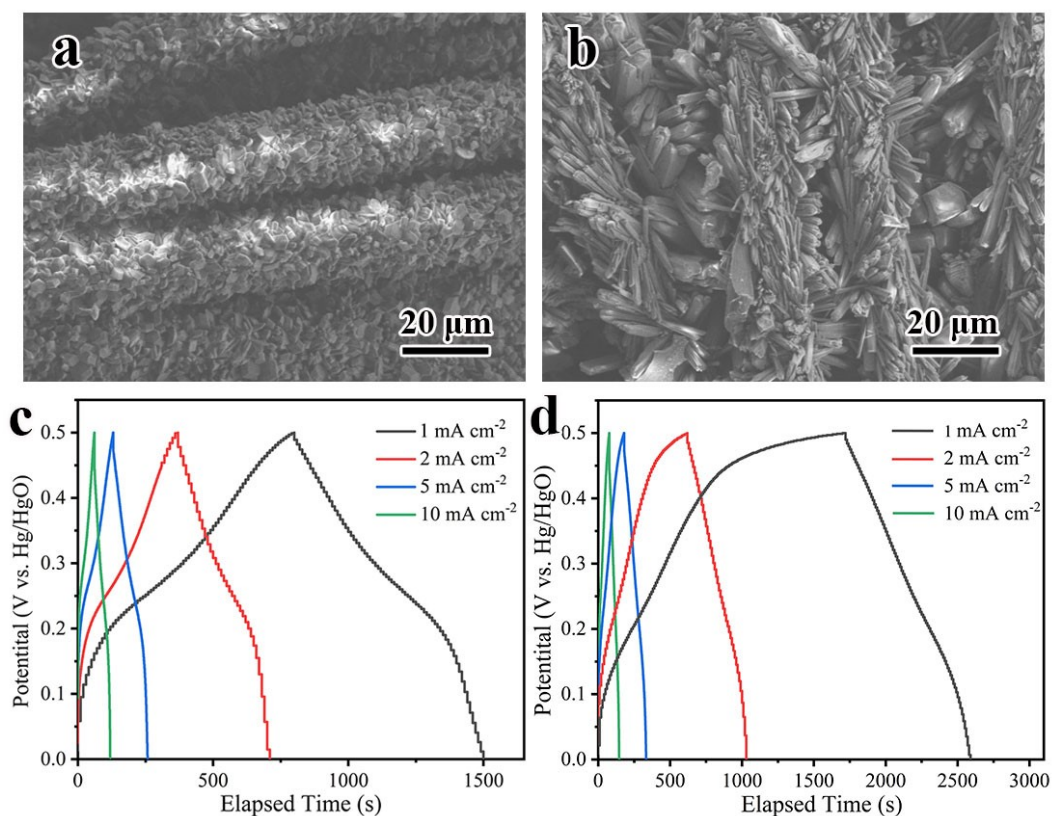

**Fig. S1** (a, b) SEM images and (c, d) capacitive performances of Co/CC immersed in a 2-MeIM aqueous solution for 24 h followed by adding  $\text{Co}(\text{NO}_3)_2 \cdot 6\text{H}_2\text{O}$  aqueous solution for another 24 h (a, c) and 72 h (b, d).

The immersion time of Co/CC was optimized to regulate the ZIF-67 mass-loading on CC in preliminary experiments. It was observed from SEM images that the morphology of samples obtained at different immersion time was different. A shorter immersion time (ZIF-67/CC-24, Fig. S1a) was not helpful to preferred orientation growth of ZIF-67, whereas a longer time (ZIF-67/CC-72, Fig. S1b) caused the bundled formation of ZIF-67 rods. The ZIF-67 mass-loading of ZIF-67/CC-24 and ZIF-67/CC-72 was about 6 and 20  $\text{mg cm}^{-2}$ , respectively. The areal specific capacitances of ZIF-67/CC-24 were about 1400, 1360, 1270 and 1180  $\text{mF cm}^{-2}$  at 1, 2, 5 and 10  $\text{mA cm}^{-2}$ . The corresponding gravimetric specific capacitances were 233, 227, 212 and 197  $\text{F g}^{-1}$ , respectively. For ZIF-67/CC-72 with higher mass-loading, the areal specific capacitances were 1740, 1640, 1530 and 1380  $\text{mF cm}^{-2}$  at 1, 2, 5 and 10  $\text{mA cm}^{-2}$ .

While the gravimetric specific capacitances dropped to 87, 82, 77 and 69 F g<sup>-1</sup>, respectively. Therefore, the change of capacitive performances was not only due to the variation of mass-loading but also the different morphology.

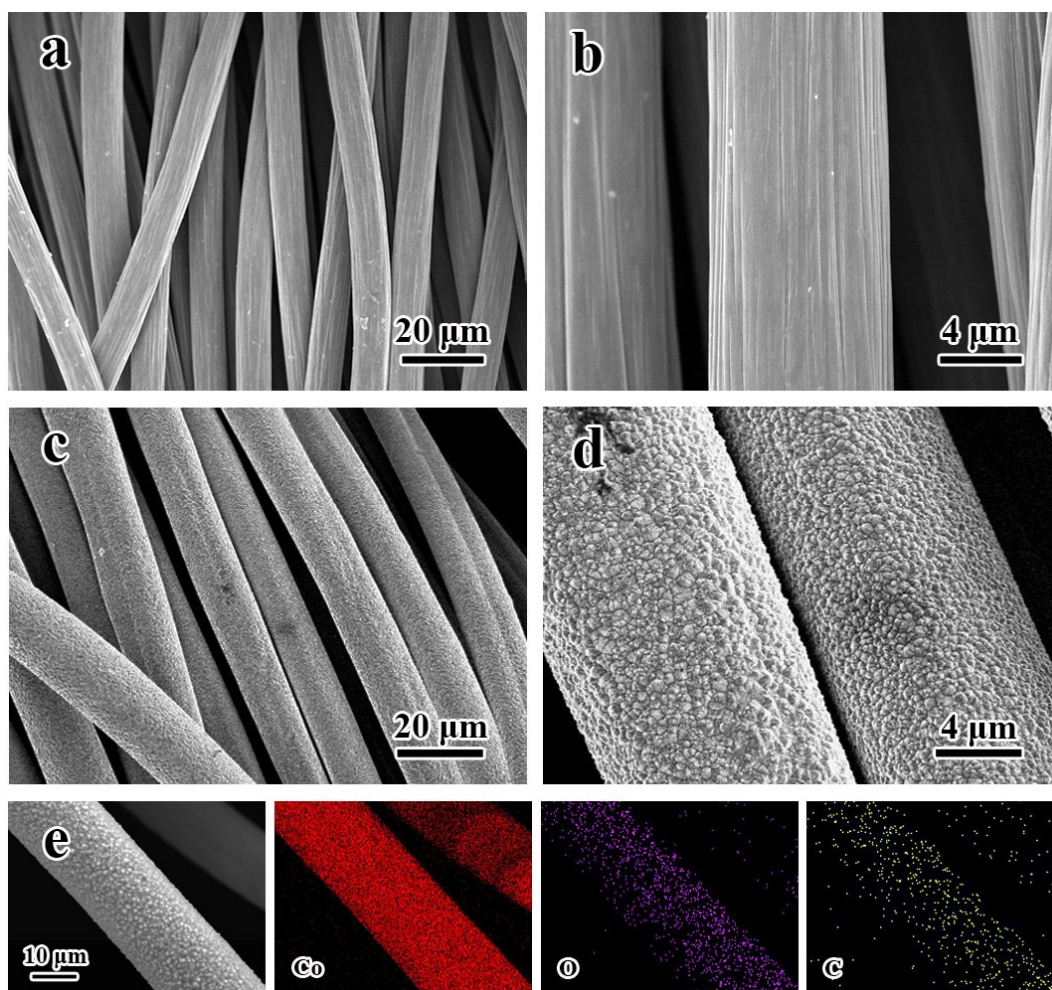

**Fig. S2** (a-d) SEM images of bare CC (a, b) and Co/CC (c, d). (e) EDS mappings of Co/CC.

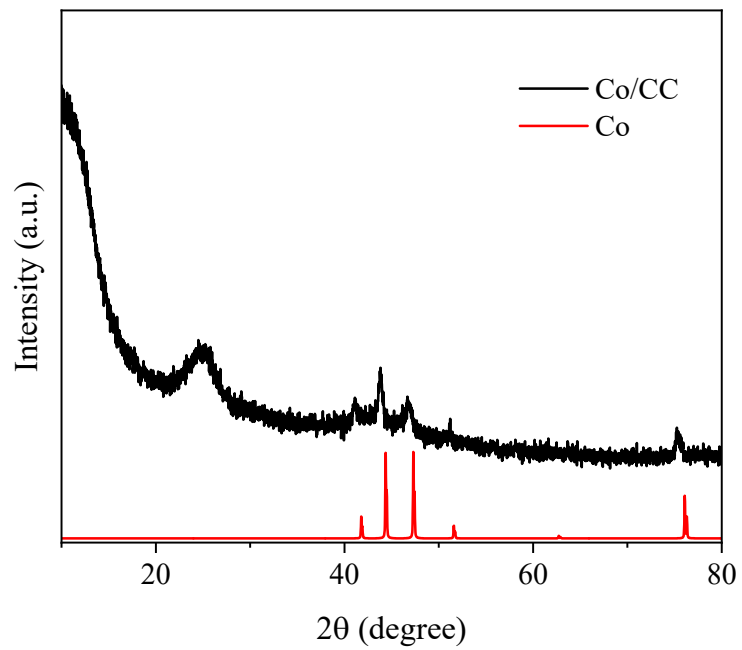

**Fig. S3** XRD pattern of Co/CC.

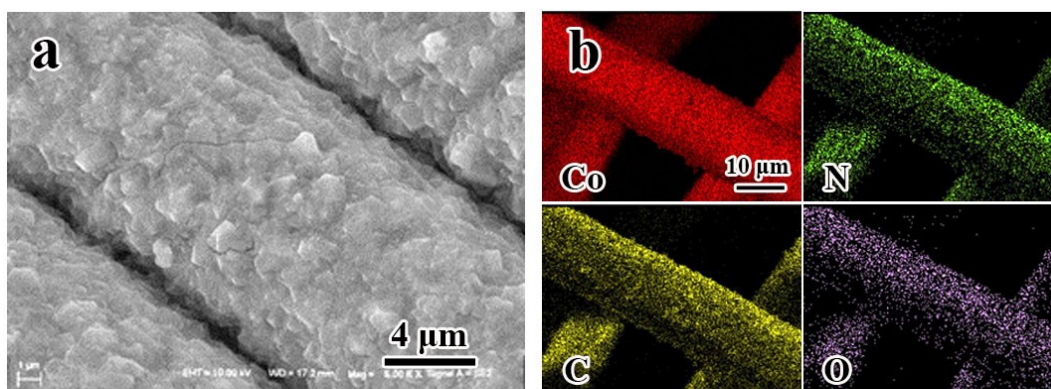

**Fig. S4** (a) SEM image and (b) EDS mappings of ZIF-67/CC-24.

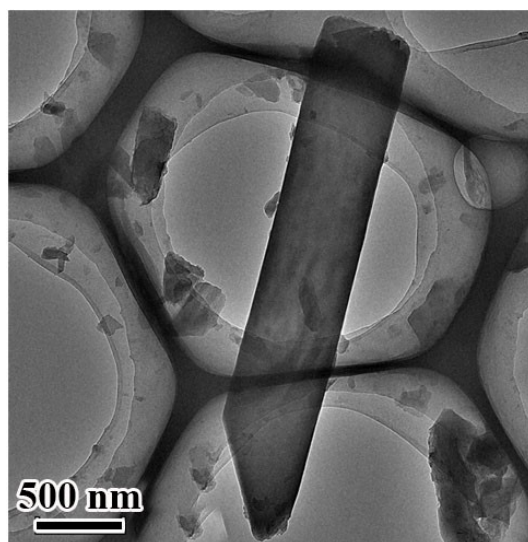

**Fig. S5** TEM image of ZIF-67/CC.

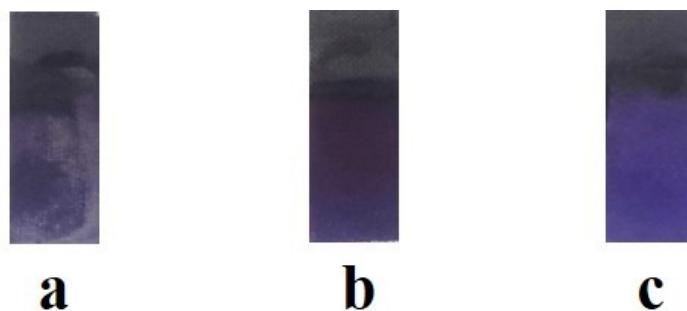

**Fig. S6** Digital photographs of ZIF-67 grown on bare CC and Co-covered CC: (a) bare CC immersed in an aqueous solution containing 2-MeIM and  $\text{Co}(\text{NO}_3)_2 \cdot 6\text{H}_2\text{O}$  for 72 h; (b) Co/CC immersed in a 2-MeIM aqueous solution for 72 h; (c) Co/CC immersed in a 2-MeIM aqueous solution for 24 h followed by adding  $\text{Co}(\text{NO}_3)_2 \cdot 6\text{H}_2\text{O}$  aqueous solution for another 48 h.



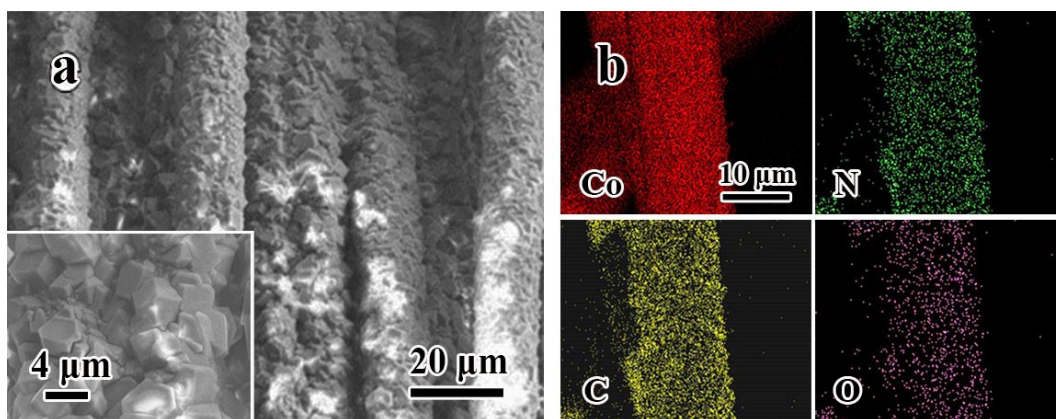

**Fig. S7** (a) SEM image and (b) EDS mappings of ZIF-67/CC-NC.

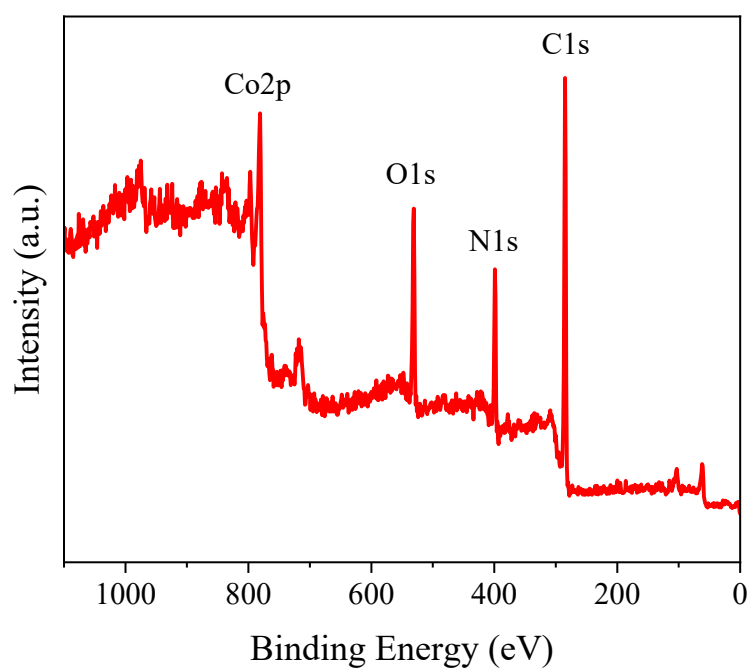

**Fig. S8** Full scan survey XPS spectrum for ZIF-67/CC-24.

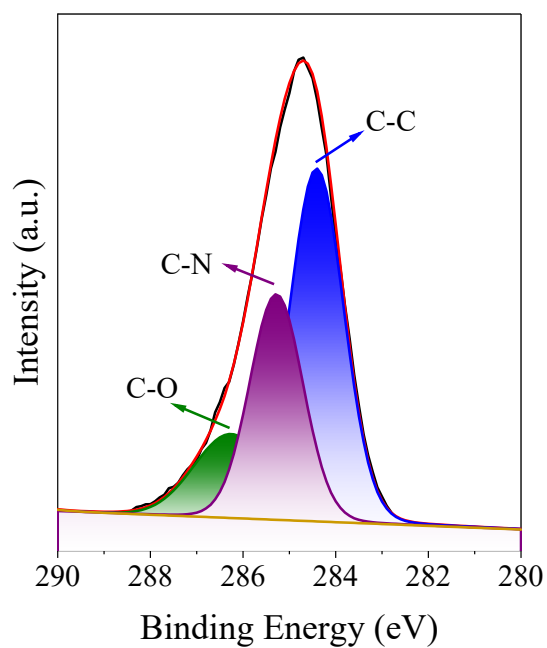

**Fig. S9** High-resolution XPS C1s spectrum of ZIF-67/CC.

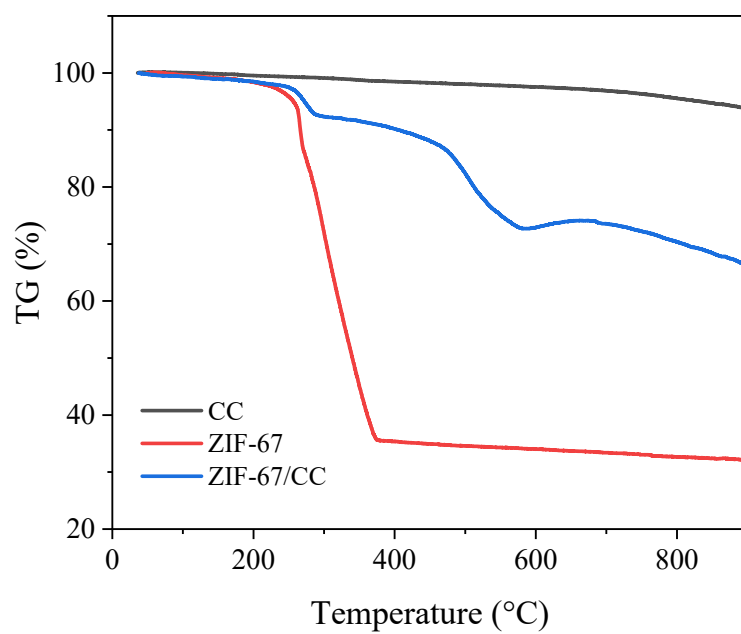

**Fig. S10** TGA curves of ZIF-67/CC, CC and ZIF-67 powders.



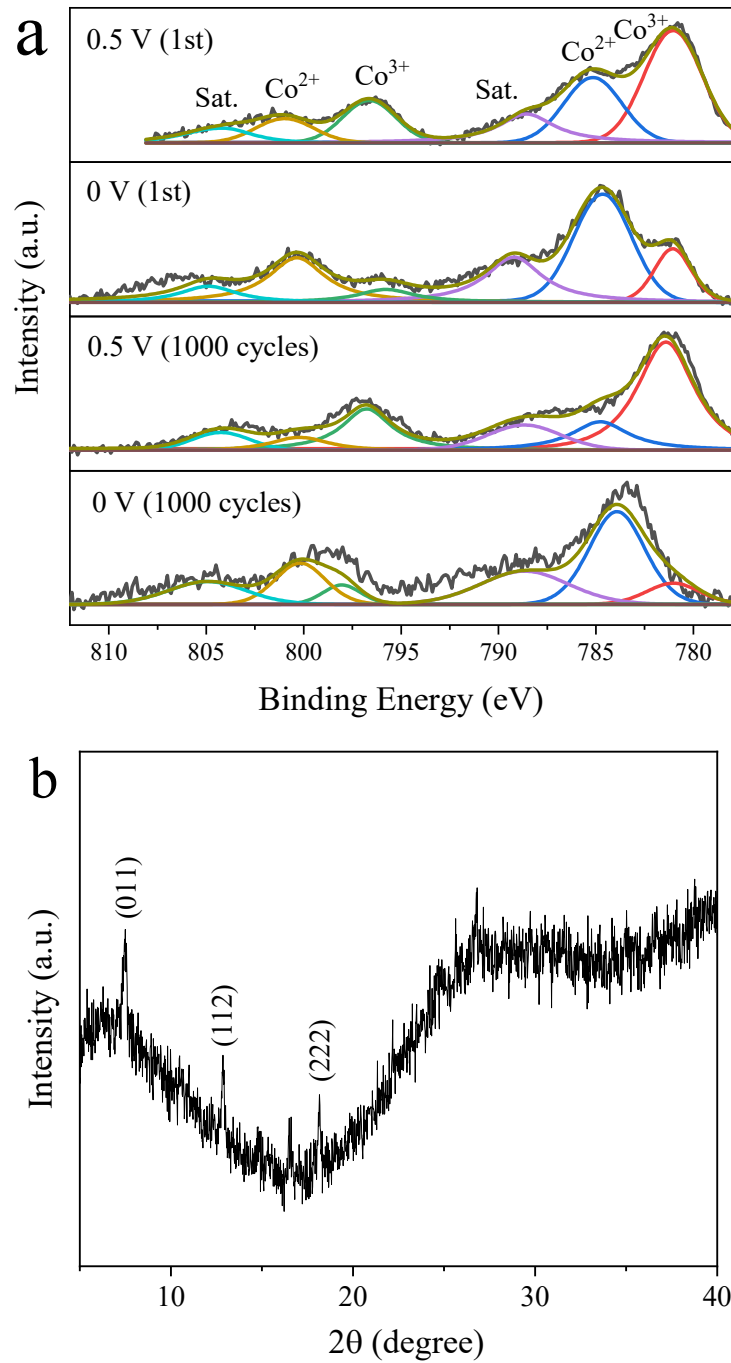

**Fig. S11** (a) XPS spectra of Co 2p and (b) XRD pattern of ZIF-67/CC electrode after cycling.

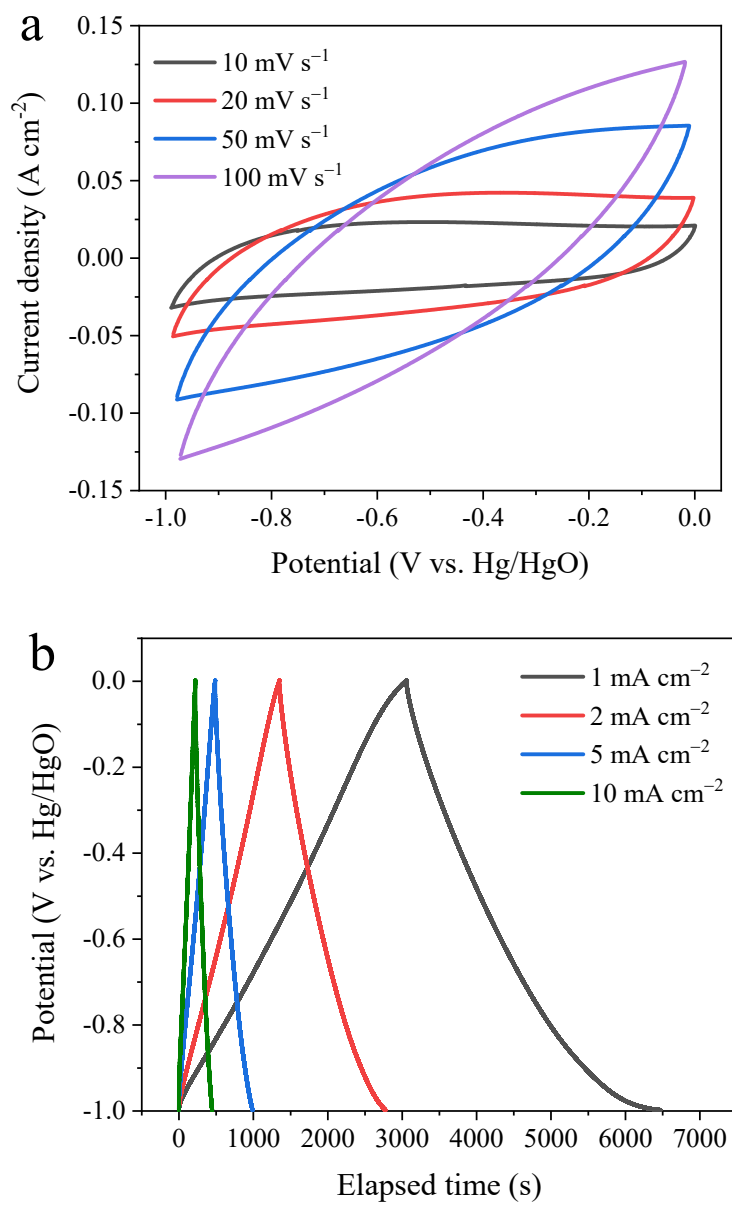

**Fig. S12** (a) CV curves of AC/CC electrode at different scan rates. (b) Galvanostatic charge-discharge curves of AC/CC electrode at different current densities.

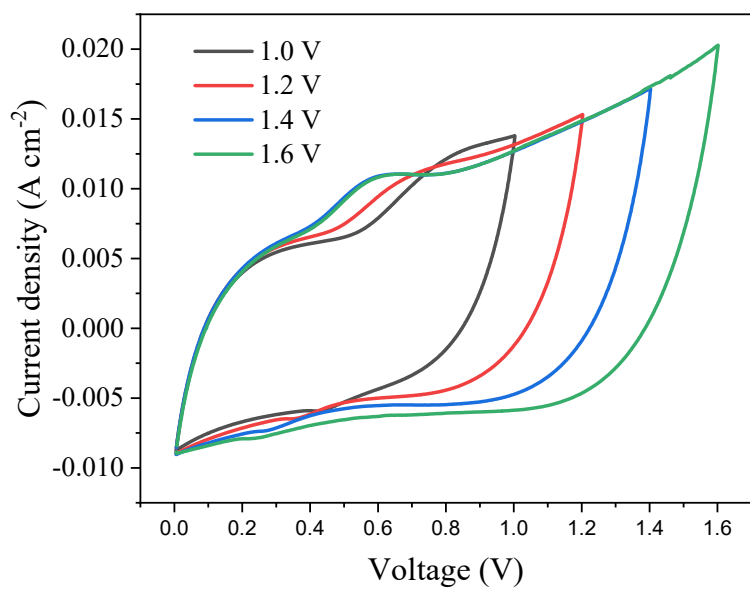

**Fig. S13** CV curves of ZIF-67/CC//AC/CC ASSC device collected within different potential windows at  $10 \text{ mV s}^{-1}$ .

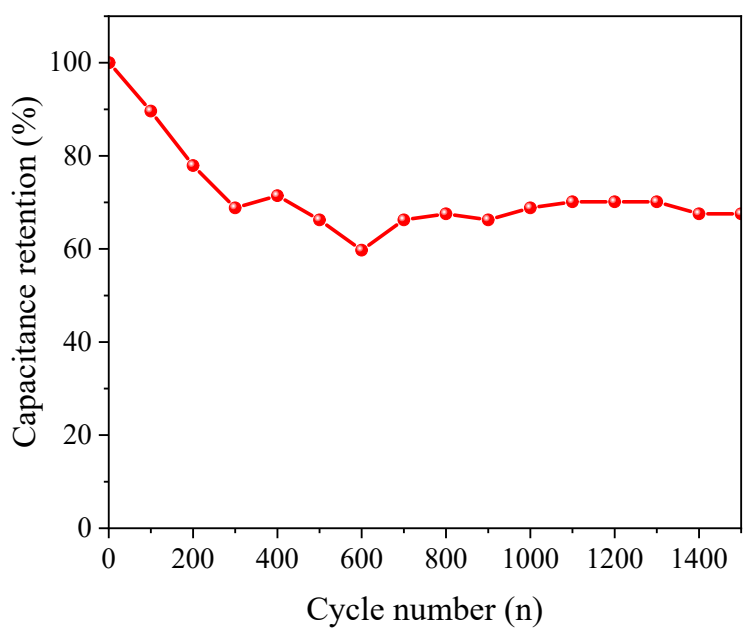

**Fig. S14** Cycling performance of ZIF-67/CC//AC/CC ASSC device at  $10 \text{ mA cm}^{-2}$ .

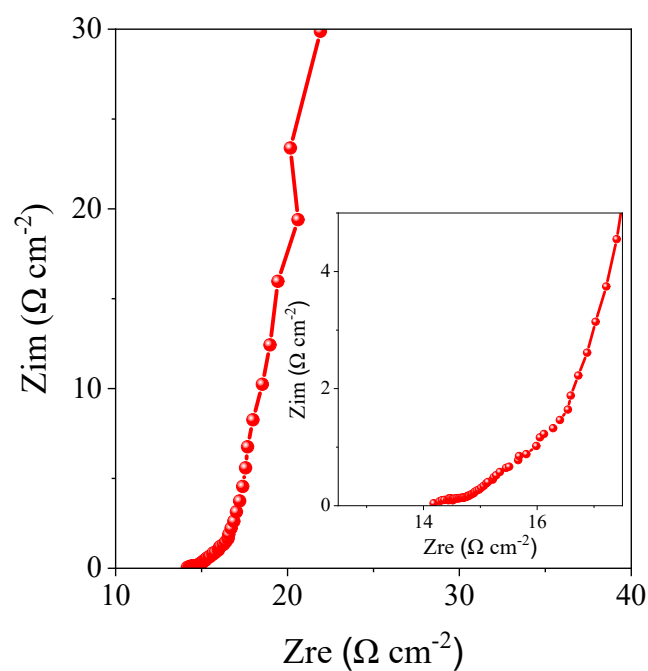

**Fig. S15** Nyquist plot of the ASSC device.

**Table S1** Capacitive performance comparison of reported MOF materials.

| Materials           | Electrolyte                        | Current<br>(A g <sup>-1</sup> )    | Capacitances<br>(F g <sup>-1</sup> ) | Rate capability<br>(%)          | Cyclic stability<br>(%/cycles) | Ref.      |
|---------------------|------------------------------------|------------------------------------|--------------------------------------|---------------------------------|--------------------------------|-----------|
| Cu-CAT NWAs         | 3 M KCl                            | 0.5                                | 202                                  | 66 (0.5-10 A g <sup>-1</sup> )  | 80/5000                        | [11]      |
| ZIF-67/PEDOT        | 1 M H <sub>2</sub> SO <sub>4</sub> | 1                                  | 107                                  | 55 (0.5-10 A g <sup>-1</sup> )  | 85/2000                        | [18]      |
| ZIF-67 microflowers | 1 M KOH                            | 1                                  | 188.7                                | 73 (0.5-8 A g <sup>-1</sup> )   | 105/3000                       | [35]      |
| PPy/Ni-CAT-NWs      | 3 M KCl                            | 0.1                                | 284                                  | 70 (0.1-0.6 A g <sup>-1</sup> ) | -                              | [36]      |
| rGO/Cu-MOF fiber    | 1 M KCl                            | 0.005<br>(mA<br>cm <sup>-1</sup> ) | 2.17<br>(mF cm <sup>-1</sup> )       | -                               | 69/1000                        | [37]      |
| ZIF-67/CC           | 1M LiOH                            | 1                                  | 257                                  | 91 (1-10 mA cm <sup>-2</sup> )  | 99/10000                       | This work |

**Table S2** Comparison of areal energy and power densities for some reported MOF-based devices.

| Devices                                                                                    | Mass loading<br>(mg cm <sup>-2</sup> ) | Electrolyte                             | Energy density<br>(mWh cm <sup>-2</sup> ) | Power density<br>(mW cm <sup>-2</sup> ) | Ref.      |
|--------------------------------------------------------------------------------------------|----------------------------------------|-----------------------------------------|-------------------------------------------|-----------------------------------------|-----------|
| Ni@Z67//AC                                                                                 | -                                      | 3M KOH                                  | 3.8×10 <sup>-2</sup>                      | 0.7                                     | [38]      |
| Ti <sub>3</sub> C <sub>2</sub> T <sub>x</sub> /ZIF-67/CoV <sub>2</sub> O <sub>6</sub> //AC | 1-1.5                                  | 3M KOH                                  | 3.6×10 <sup>-2</sup>                      | 0.75                                    | [26]      |
| ZIF-PPy*                                                                                   | 10                                     | PVA/Na <sub>2</sub> SO <sub>4</sub> gel | 1.1×10 <sup>-2</sup>                      | 1.44                                    | [39]      |
| PANI-ZIF67-CC*                                                                             | 4                                      | PVA/H <sub>2</sub> SO <sub>4</sub> gel  | 4.4×10 <sup>-3</sup>                      | 0.48                                    | [4]       |
| Co-MOF/NF//AC                                                                              | 6.656                                  | 2M KOH                                  | 1.7                                       | 4.0                                     | [40]      |
| Co-MOF/graphenen//AC                                                                       | 2.6                                    | 6M KOH                                  | 2.1×10 <sup>-2</sup>                      | 2.21                                    | [41]      |
| CoNi-MOF//AC                                                                               | 1                                      | 1M KOH                                  | 2.9×10 <sup>-2</sup>                      | 1.5                                     | [12]      |
| CC/CoNi-MOF//g-CNT                                                                         | 1.48                                   | 1M KOH                                  | 0.264                                     | 0.704                                   | [42]      |
| Ni-CAT/NiCo-LDH/NF//AC                                                                     | 1.5                                    | 1M KOH                                  | 9.3×10 <sup>-2</sup>                      | 18.3                                    | [9]       |
| Cu <sub>3</sub> (HHTP) <sub>2</sub> //PPy                                                  | -                                      | PVA/KCl hydrogel                        | 8.8×10 <sup>-5</sup>                      | 4.5×10 <sup>-3</sup>                    | [43]      |
| Cu-CAT NWAs*                                                                               | 0.5                                    | PVA/KCl gel                             | 5.2×10 <sup>-3</sup>                      | 10 <sup>-4</sup>                        | [11]      |
| Cu-CAT-NWAs/PPy                                                                            | 2.01                                   | LiCl-PVA gel                            | 2.2×10 <sup>-2</sup>                      | 0.47                                    | [10]      |
| ZIF-67/CC//AC                                                                              | 12                                     | LiOH/PVA gel                            | 380                                       | 1600                                    | This work |

\* Symmetric supercapacitor
